# Supplementary material for: Palladium-promoted sulfur atom migration on carboranes: facile B(4)−S bond formation from mononuclear Pd-B(4) complexes
Source: publisher site journal article supplement (doi:10.1515/pac-2017-0609), 2017-08-20

# checkCIF/PLATON report

Structure factors have been supplied for datablock(s) mo\_70304b

THIS REPORT IS FOR GUIDANCE ONLY. IF USED AS PART OF A REVIEW PROCEDURE FOR PUBLICATION, IT SHOULD NOT REPLACE THE EXPERTISE OF AN EXPERIENCED CRYSTALLOGRAPHIC REFEREE.

No syntax errors found.      CIF dictionary      Interpreting this report

## Datablock: mo\_70304b

---

|                 |                       |                                     |
|-----------------|-----------------------|-------------------------------------|
| Bond precision: | C-C = 0.0176 A        | Wavelength=0.71073                  |
| Cell:           | a=11.185(3)           | b=18.389(6)      c=19.122(6)        |
|                 | alpha=80.688(5)       | beta=79.836(5)      gamma=85.532(5) |
| Temperature:    | 173 K                 |                                     |
|                 | Calculated            | Reported                            |
| Volume          | 3815(2)               | 3815(2)                             |
| Space group     | P -1                  | P -1                                |
| Hall group      | -P 1                  | -P 1                                |
| Moiety formula  | C35 H40 B10 N P2 Pd S | ?                                   |
| Sum formula     | C35 H40 B10 N P2 Pd S | C35 H40 B10 N P2 Pd S               |
| Mr              | 783.18                | 783.18                              |
| Dx,g cm-3       | 1.364                 | 1.363                               |
| Z               | 4                     | 4                                   |
| Mu (mm-1)       | 0.653                 | 0.653                               |
| F000            | 1596.0                | 1596.0                              |
| F000'           | 1593.67               |                                     |
| h,k,lmax        | 13,22,23              | 13,22,23                            |
| Nref            | 15000                 | 14832                               |
| Tmin,Tmax       | 0.882,0.901           | 0.585,0.746                         |
| Tmin'           | 0.593                 |                                     |

Correction method= # Reported T Limits: Tmin=0.585 Tmax=0.746  
AbsCorr = MULTI-SCAN

Data completeness= 0.989      Theta(max)= 26.000

R(reflections)= 0.0826( 9641)      wR2(reflections)= 0.2852( 14832)

S = 1.032      Npar= 927

---

The following ALERTS were generated. Each ALERT has the format  
**test-name\_ALERT\_alert-type\_alert-level.**  
Click on the hyperlinks for more details of the test.

---

**Alert level B**

PLAT411\_ALERT\_2\_B Short Inter H...H Contact H13A .. H7' . 1.99 Ang.

---

**Alert level C**

PLAT084\_ALERT\_3\_C High wR2 Value (i.e. > 0.25) ..... 0.29 Report  
PLAT213\_ALERT\_2\_C Atom N1 has ADP max/min Ratio ..... 3.2 prolat  
PLAT213\_ALERT\_2\_C Atom B7 has ADP max/min Ratio ..... 3.3 oblate  
PLAT213\_ALERT\_2\_C Atom N2 has ADP max/min Ratio ..... 3.1 prolat  
PLAT213\_ALERT\_2\_C Atom C39 has ADP max/min Ratio ..... 3.5 prolat  
PLAT213\_ALERT\_2\_C Atom B14 has ADP max/min Ratio ..... 3.3 oblate  
PLAT220\_ALERT\_2\_C Non-Solvent Resd 1 C Ueq(max)/Ueq(min) Range 3.3 Ratio  
PLAT220\_ALERT\_2\_C Non-Solvent Resd 2 C Ueq(max)/Ueq(min) Range 4.1 Ratio  
PLAT222\_ALERT\_3\_C Non-Solvent Resd 2 H Uiso(max)/Uiso(min) Range 4.2 Ratio  
PLAT234\_ALERT\_4\_C Large Hirshfeld Difference C14 -- C15 .. 0.17 Ang.  
PLAT234\_ALERT\_4\_C Large Hirshfeld Difference C30 -- C31 .. 0.16 Ang.  
PLAT234\_ALERT\_4\_C Large Hirshfeld Difference B8 -- B12 .. 0.16 Ang.  
PLAT234\_ALERT\_4\_C Large Hirshfeld Difference N2 -- C39 .. 0.16 Ang.  
PLAT234\_ALERT\_4\_C Large Hirshfeld Difference C57 -- C58 .. 0.19 Ang.  
PLAT234\_ALERT\_4\_C Large Hirshfeld Difference B18 -- B22 .. 0.18 Ang.  
PLAT241\_ALERT\_2\_C High 'MainMol' Ueq as Compared to Neighbors of C57 Check  
PLAT242\_ALERT\_2\_C Low 'MainMol' Ueq as Compared to Neighbors of C53 Check  
PLAT330\_ALERT\_2\_C Large Average Phenyl C-C Dist. C4' -C9' 1.41 Ang.  
PLAT342\_ALERT\_3\_C Low Bond Precision on C-C Bonds ..... 0.01758 Ang.  
PLAT351\_ALERT\_3\_C Long C-H (X0.96,N1.08A) C2 - H2 .. 1.12 Ang.  
PLAT351\_ALERT\_3\_C Long C-H (X0.96,N1.08A) C37 - H37 .. 1.12 Ang.  
PLAT411\_ALERT\_2\_C Short Inter H...H Contact H57 .. H57 . 2.05 Ang.  
PLAT906\_ALERT\_3\_C Large K value in the Analysis of Variance ..... 7.896 Check  
PLAT906\_ALERT\_3\_C Large K value in the Analysis of Variance ..... 2.074 Check  
PLAT911\_ALERT\_3\_C Missing # FCF Refl Between THmin & STh/L= 0.600 161 Report  
PLAT918\_ALERT\_3\_C Reflection(s) with I(obs) much Smaller I(calc) . 10 Check  
PLAT971\_ALERT\_2\_C Check Calcd Residual Density 0.78A From Pd2 2.21 eA-3  
PLAT972\_ALERT\_2\_C Check Calcd Residual Density 0.77A From Pd2 -1.90 eA-3  
PLAT972\_ALERT\_2\_C Check Calcd Residual Density 0.85A From Pd1 -1.58 eA-3  
PLAT977\_ALERT\_2\_C Check the Negative Difference Density on H4 -0.52 eA-3  
PLAT977\_ALERT\_2\_C Check the Negative Difference Density on H14A -0.54 eA-3  
PLAT977\_ALERT\_2\_C Check the Negative Difference Density on H19 -0.33 eA-3  
PLAT977\_ALERT\_2\_C Check the Negative Difference Density on H44 -0.37 eA-3  
PLAT977\_ALERT\_2\_C Check the Negative Difference Density on H46B -0.31 eA-3  
PLAT977\_ALERT\_2\_C Check the Negative Difference Density on H48 -0.44 eA-3  
PLAT977\_ALERT\_2\_C Check the Negative Difference Density on H49 -0.34 eA-3  
PLAT978\_ALERT\_2\_C Number C-C Bonds with Positive Residual Density. 0 Note

---

**Alert level G**

PLAT002\_ALERT\_2\_G Number of Distance or Angle Restraints on AtSite 5 Note  
PLAT003\_ALERT\_2\_G Number of Uiso or Uij Restrained non-H Atoms ... 15 Report  
PLAT063\_ALERT\_4\_G Crystal Size Likely too Large for Beam Size .... 0.80 mm  
PLAT072\_ALERT\_2\_G SHELXL First Parameter in WGHT Unusually Large 0.16 Report  
PLAT083\_ALERT\_2\_G SHELXL Second Parameter in WGHT Unusually Large 23.19 Why ?  
PLAT154\_ALERT\_1\_G The s.u.'s on the Cell Angles are Equal ..(Note) 0.005 Degree  
PLAT171\_ALERT\_4\_G The CIF-Embedded .res File Contains EADP Records 3 Report  
PLAT172\_ALERT\_4\_G The CIF-Embedded .res File Contains DFIX Records 2 Report  
PLAT186\_ALERT\_4\_G The CIF-Embedded .res File Contains ISOR Records 2 Report  
PLAT301\_ALERT\_3\_G Main Residue Disorder .....(Resd 1).. 12 % Note  
PLAT303\_ALERT\_2\_G Full Occupancy H-Atom H4 with # Connections 2.00 Check  
PLAT303\_ALERT\_2\_G Full Occupancy H-Atom H14A with # Connections 2.00 Check  
PLAT343\_ALERT\_2\_G Unusual sp? Angle Range in Main Residue for C1 Check  
PLAT343\_ALERT\_2\_G Unusual sp? Angle Range in Main Residue for C2 Check  
PLAT343\_ALERT\_2\_G Unusual sp? Angle Range in Main Residue for C36 Check  
PLAT343\_ALERT\_2\_G Unusual sp? Angle Range in Main Residue for C37 Check

|                         |                                              |       |   |     |    |           |
|-------------------------|----------------------------------------------|-------|---|-----|----|-----------|
| PLAT367_ALERT_2_G Long? | C(sp?)-C(sp?) Bond                           | C1    | - | C2  | .. | 1.62 Ang. |
| PLAT367_ALERT_2_G Long? | C(sp?)-C(sp?) Bond                           | C1    | - | C3  | .. | 1.54 Ang. |
| PLAT367_ALERT_2_G Long? | C(sp?)-C(sp?) Bond                           | C36   | - | C37 | .. | 1.64 Ang. |
| PLAT367_ALERT_2_G Long? | C(sp?)-C(sp?) Bond                           | C36   | - | C38 | .. | 1.53 Ang. |
| PLAT860_ALERT_3_G       | Number of Least-Squares Restraints           | ..... |   |     |    | 93 Note   |
| PLAT912_ALERT_4_G       | Missing # of FCF Reflections Above STh/L=    | 0.600 |   |     |    | 7 Note    |
| PLAT933_ALERT_2_G       | Number of OMIT Records in Embedded .res File | ...   |   |     |    | 3 Note    |

---

0 **ALERT level A** = Most likely a serious problem - resolve or explain  
 1 **ALERT level B** = A potentially serious problem, consider carefully  
 37 **ALERT level C** = Check. Ensure it is not caused by an omission or oversight  
 23 **ALERT level G** = General information/check it is not something unexpected

1 ALERT type 1 CIF construction/syntax error, inconsistent or missing data  
 38 ALERT type 2 Indicator that the structure model may be wrong or deficient  
 11 ALERT type 3 Indicator that the structure quality may be low  
 11 ALERT type 4 Improvement, methodology, query or suggestion  
 0 ALERT type 5 Informative message, check

---

## Validation response form

Please find below a validation response form (VRF) that can be filled in and pasted into your CIF.

```
# start Validation Reply Form
_vrf_PLAT084_mo_70304b
;
PROBLEM: High wR2 Value (i.e. > 0.25) ..... 0.29 Report
RESPONSE: ...
;
_vrf_PLAT213_mo_70304b
;
PROBLEM: Atom N1 has ADP max/min Ratio ..... 3.2 prolat
RESPONSE: ...
;
_vrf_PLAT220_mo_70304b
;
PROBLEM: Non-Solvent Resd 1 C Ueq(max)/Ueq(min) Range 3.3 Ratio
RESPONSE: ...
;
_vrf_PLAT222_mo_70304b
;
PROBLEM: Non-Solvent Resd 2 H Uiso(max)/Uiso(min) Range 4.2 Ratio
RESPONSE: ...
;
_vrf_PLAT234_mo_70304b
;
PROBLEM: Large Hirshfeld Difference C14 -- C15 .. 0.17 Ang.
RESPONSE: ...
;
_vrf_PLAT241_mo_70304b
;
PROBLEM: High 'MainMol' Ueq as Compared to Neighbors of C57 Check
RESPONSE: ...
;
_vrf_PLAT242_mo_70304b
;
PROBLEM: Low 'MainMol' Ueq as Compared to Neighbors of C53 Check
RESPONSE: ...
;
```

```

_vrf_PLAT330_mo_70304b
;
PROBLEM: Large Average Phenyl C-C Dist. C4' -C9' 1.41 Ang.
RESPONSE: ...
;
_vrf_PLAT342_mo_70304b
;
PROBLEM: Low Bond Precision on C-C Bonds ..... 0.01758 Ang.
RESPONSE: ...
;
_vrf_PLAT351_mo_70304b
;
PROBLEM: Long C-H (X0.96,N1.08A) C2 - H2 .. 1.12 Ang.
RESPONSE: ...
;
_vrf_PLAT411_mo_70304b
;
PROBLEM: Short Inter H...H Contact H57 .. H57 . 2.05 Ang.
RESPONSE: ...
;
_vrf_PLAT906_mo_70304b
;
PROBLEM: Large K value in the Analysis of Variance ..... 7.896 Check
RESPONSE: ...
;
_vrf_PLAT911_mo_70304b
;
PROBLEM: Missing # FCF Refl Between THmin & STh/L= 0.600 161 Report
RESPONSE: ...
;
_vrf_PLAT918_mo_70304b
;
PROBLEM: Reflection(s) with I(obs) much Smaller I(calc) . 10 Check
RESPONSE: ...
;
_vrf_PLAT971_mo_70304b
;
PROBLEM: Check Calcd Residual Density 0.78A From Pd2 2.21 eA-3
RESPONSE: ...
;
_vrf_PLAT972_mo_70304b
;
PROBLEM: Check Calcd Residual Density 0.77A From Pd2 -1.90 eA-3
RESPONSE: ...
;
_vrf_PLAT977_mo_70304b
;
PROBLEM: Check the Negative Difference Density on H4 -0.52 eA-3
RESPONSE: ...
;
_vrf_PLAT978_mo_70304b
;
PROBLEM: Number C-C Bonds with Positive Residual Density. 0 Note
RESPONSE: ...
;
# end Validation Reply Form

```

---

It is advisable to attempt to resolve as many as possible of the alerts in all categories. Often the minor alerts point to easily fixed oversights, errors and omissions in your CIF or refinement strategy, so attention to these fine details can be worthwhile. In order to resolve some of the more serious problems it may be necessary to carry out additional measurements or structure refinements. However, the purpose of your study may justify the reported deviations and the more serious of these should normally be commented upon in the discussion or experimental section of a paper or in the "special\_details" fields of the CIF. checkCIF was carefully designed to identify outliers and unusual parameters, but every test has its limitations and alerts that are not important in a particular case may appear. Conversely, the absence of alerts does not guarantee there are no aspects of the results needing attention. It is up to the individual to critically assess their own results and, if necessary, seek expert advice.

### **Publication of your CIF in IUCr journals**

A basic structural check has been run on your CIF. These basic checks will be run on all CIFs submitted for publication in IUCr journals (*Acta Crystallographica*, *Journal of Applied Crystallography*, *Journal of Synchrotron Radiation*); however, if you intend to submit to *Acta Crystallographica Section C* or *E* or *IUCrData*, you should make sure that full publication checks are run on the final version of your CIF prior to submission.

### **Publication of your CIF in other journals**

Please refer to the *Notes for Authors* of the relevant journal for any special instructions relating to CIF submission.

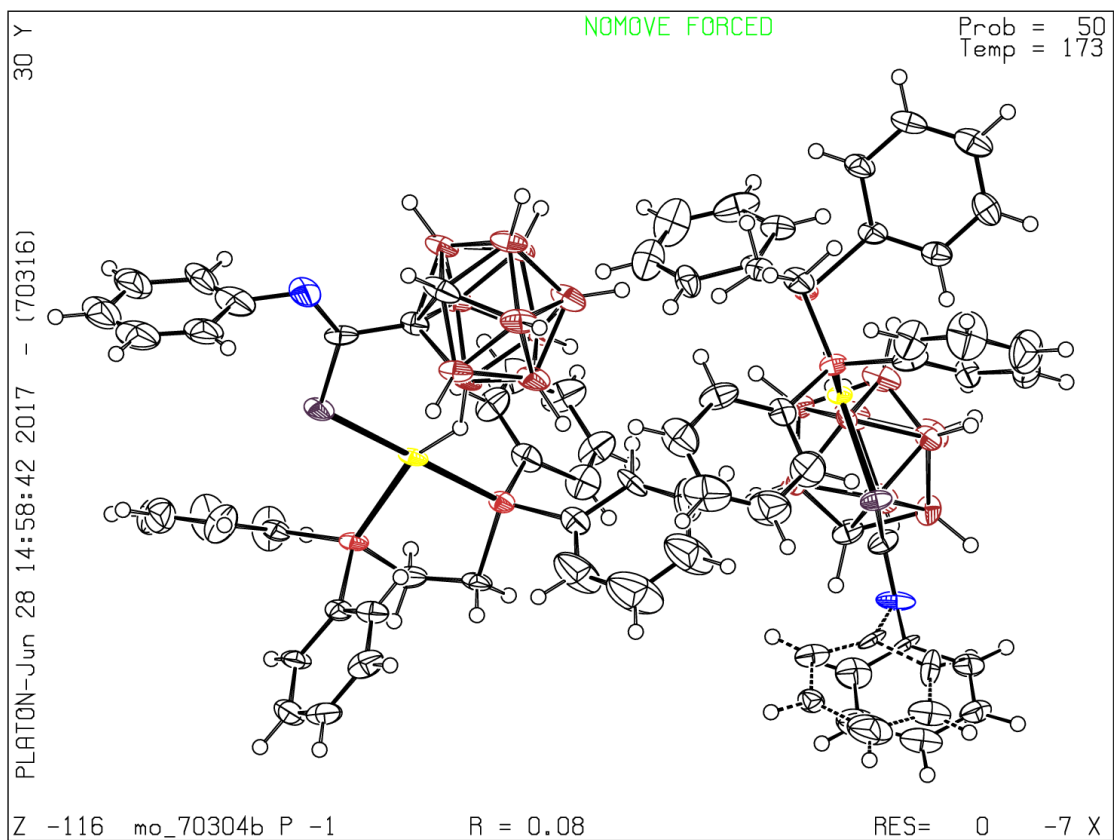

Supplement: Supplementary file 5 [file Complex_6-checkcif.pdf › Complex_6-checkcif.pdf]
