# Supplementary material for: Palladium-promoted sulfur atom migration on carboranes: facile B(4)−S bond formation from mononuclear Pd-B(4) complexes
Source: publisher site journal article supplement (doi:10.1515/pac-2017-0609), 2017-08-20

# checkCIF/PLATON report

Structure factors have been supplied for datablock(s) mo\_70415aa

THIS REPORT IS FOR GUIDANCE ONLY. IF USED AS PART OF A REVIEW PROCEDURE FOR PUBLICATION, IT SHOULD NOT REPLACE THE EXPERTISE OF AN EXPERIENCED CRYSTALLOGRAPHIC REFEREE.

No syntax errors found.      CIF dictionary      Interpreting this report

## Datablock: mo\_70415aa

---

|                        |                                                    |                                       |
|------------------------|----------------------------------------------------|---------------------------------------|
| Bond precision:        | C-C = 0.0092 Å                                     | Wavelength=0.71073                    |
| Cell:                  | a=30.6731(19)      b=12.4071(8)      c=25.1314(16) |                                       |
|                        | alpha=90      beta=104.710(1)      gamma=90        |                                       |
| Temperature:           | 173 K                                              |                                       |
|                        | Calculated                                         | Reported                              |
| Volume                 | 9250.6(10)                                         | 9250.6(10)                            |
| Space group            | P 21/c                                             | P 21/c                                |
| Hall group             | -P 2ybc                                            | -P 2ybc                               |
| Moiety formula         | 4(C34 H44 B20 N4 Pd2 S2),<br>C Cl3                 | ?                                     |
| Sum formula            | C137 H176 B80 Cl3 N16 Pd8<br>S8                    | C34.25 H44.25 B20 Cl0.75<br>N4 Pd2 S2 |
| Mr                     | 4125.77                                            | 1031.69                               |
| Dx, g cm <sup>-3</sup> | 1.481                                              | 1.482                                 |
| Z                      | 2                                                  | 8                                     |
| Mu (mm <sup>-1</sup> ) | 0.945                                              | 0.945                                 |
| F000                   | 4114.0                                             | 4116.0                                |
| F000'                  | 4101.64                                            |                                       |
| h,k,lmax               | 39,16,32                                           | 39,16,32                              |
| Nref                   | 21336                                              | 21148                                 |
| Tmin,Tmax              | 0.873,0.910                                        | 0.669,0.746                           |
| Tmin'                  | 0.812                                              |                                       |

Correction method= # Reported T Limits: Tmin=0.669 Tmax=0.746  
AbsCorr = MULTI-SCAN

Data completeness= 0.991      Theta(max)= 27.538

R(reflections)= 0.0504( 13739)      wR2(reflections)= 0.1483( 21148)

S = 1.055      Npar= 1165

---

The following ALERTS were generated. Each ALERT has the format

**test-name\_ALERT\_alert-type\_alert-level.**

Click on the hyperlinks for more details of the test.

### Alert level B

|                   |                                                  |      |       |
|-------------------|--------------------------------------------------|------|-------|
| PLAT327_ALERT_2_B | Possible Missing H on sp3? Carbon .....          | *C69 | Check |
| PLAT934_ALERT_3_B | Number of (Iobs-Icalc)/SigmaW > 10 Outliers .... | 10   | Check |

### Alert level C

|                   |                                                  |                               |              |
|-------------------|--------------------------------------------------|-------------------------------|--------------|
| PLAT041_ALERT_1_C | Calc. and Reported SumFormula                    | Strings Differ                | Please Check |
| PLAT068_ALERT_1_C | Reported F000 Differs from Calcd (or Missing)... |                               | Please Check |
| PLAT220_ALERT_2_C | Non-Solvent Resd 1                               | C Ueq(max)/Ueq(min) Range     | 3.3 Ratio    |
| PLAT220_ALERT_2_C | Non-Solvent Resd 2                               | C Ueq(max)/Ueq(min) Range     | 4.1 Ratio    |
| PLAT222_ALERT_3_C | Non-Solvent Resd 2                               | H Uiso(max)/Uiso(min) Range   | 6.6 Ratio    |
| PLAT234_ALERT_4_C | Large Hirshfeld Difference C30                   | -- C31 ..                     | 0.16 Ang.    |
| PLAT234_ALERT_4_C | Large Hirshfeld Difference B17                   | -- B18 ..                     | 0.16 Ang.    |
| PLAT234_ALERT_4_C | Large Hirshfeld Difference C57                   | -- C58 ..                     | 0.19 Ang.    |
| PLAT245_ALERT_2_C | U(iso) H45                                       | Smaller than U(eq) C45 by ... | 0.016 AngSq  |
| PLAT342_ALERT_3_C | Low Bond Precision on C-C Bonds .....            |                               | 0.00923 Ang. |
| PLAT351_ALERT_3_C | Long C-H (X0.96,N1.08A) C11                      | - H11A ..                     | 1.12 Ang.    |
| PLAT411_ALERT_2_C | Short Inter H...H Contact H5A                    | .. H33 .                      | 2.12 Ang.    |
| PLAT906_ALERT_3_C | Large K value in the Analysis of Variance .....  |                               | 4.024 Check  |
| PLAT911_ALERT_3_C | Missing # FCF Refl Between THmin & STh/L=        | 0.600                         | 98 Report    |
| PLAT918_ALERT_3_C | Reflection(s) with I(obs) much Smaller I(calc) . |                               | 2 Check      |
| PLAT977_ALERT_2_C | Check the Negative Difference Density on         | H5                            | -0.47 eA-3   |
| PLAT977_ALERT_2_C | Check the Negative Difference Density on         | H13                           | -0.36 eA-3   |
| PLAT977_ALERT_2_C | Check the Negative Difference Density on         | H20A                          | -0.39 eA-3   |
| PLAT977_ALERT_2_C | Check the Negative Difference Density on         | H23A                          | -0.34 eA-3   |
| PLAT977_ALERT_2_C | Check the Negative Difference Density on         | H33                           | -0.31 eA-3   |
| PLAT977_ALERT_2_C | Check the Negative Difference Density on         | H67                           | -0.43 eA-3   |

### Alert level G

FORMU01\_ALERT\_2\_G There is a discrepancy between the atom counts in the  
     \_chemical\_formula\_sum and the formula from the \_atom\_site\* data.  
     Atom count from \_chemical\_formula\_sum: C34.25 H44.25 B20 Cl0.75 N4 Pd  
     Atom count from the \_atom\_site data: C34.25 H44 B20 Cl0.75 N4 Pd2 S

CELLZ01\_ALERT\_1\_G Difference between formula and atom\_site contents detected.

CELLZ01\_ALERT\_1\_G WARNING: H atoms missing from atom site list. Is this intentional?  
     From the CIF: \_cell\_formula\_units\_Z 8  
     From the CIF: \_chemical\_formula\_sum C34.25 H44.25 B20 Cl0.75 N4 Pd2  
     TEST: Compare cell contents of formula and atom\_site data

| atom | Z*formula | cif sites | diff |
|------|-----------|-----------|------|
| C    | 274.00    | 274.00    | 0.00 |
| H    | 354.00    | 352.00    | 2.00 |
| B    | 160.00    | 160.00    | 0.00 |
| Cl   | 6.00      | 6.00      | 0.00 |
| N    | 32.00     | 32.00     | 0.00 |
| Pd   | 16.00     | 16.00     | 0.00 |
| S    | 16.00     | 16.00     | 0.00 |

|                   |                                                  |                   |           |
|-------------------|--------------------------------------------------|-------------------|-----------|
| PLAT002_ALERT_2_G | Number of Distance or Angle Restraints on AtSite | 10                | Note      |
| PLAT003_ALERT_2_G | Number of Uiso or Uij Restrained non-H Atoms ... | 5                 | Report    |
| PLAT045_ALERT_1_G | Calculated and Reported Z Differ by a Factor ... | 0.25              | Check     |
| PLAT164_ALERT_4_G | Nr. of Refined C-H H-Atoms in Heavy-Atom Struct. | 3                 | Note      |
| PLAT172_ALERT_4_G | The CIF-Embedded .res File Contains DFIX Records | 2                 | Report    |
| PLAT186_ALERT_4_G | The CIF-Embedded .res File Contains ISOR Records | 1                 | Report    |
| PLAT232_ALERT_2_G | Hirshfeld Test Diff (M-X) Pd4                    | -- S4 ..          | 6.5 s.u.  |
| PLAT300_ALERT_4_G | Atom Site Occupancy of Cl1                       | is Constrained at | 0.5 Check |

|                   |                                                  |                                 |       |        |
|-------------------|--------------------------------------------------|---------------------------------|-------|--------|
| PLAT300_ALERT_4_G | Atom Site Occupancy of Cl2                       | is Constrained at               | 0.5   | Check  |
| PLAT300_ALERT_4_G | Atom Site Occupancy of Cl3                       | is Constrained at               | 0.5   | Check  |
| PLAT300_ALERT_4_G | Atom Site Occupancy of C69                       | is Constrained at               | 0.5   | Check  |
| PLAT302_ALERT_4_G | Anion/Solvent/Minor-Residue Disorder (Resd 3)..  |                                 | 100   | % Note |
| PLAT343_ALERT_2_G | Unusual sp?                                      | Angle Range in Main Residue for | C1    | Check  |
| PLAT343_ALERT_2_G | Unusual sp?                                      | Angle Range in Main Residue for | C2    | Check  |
| PLAT343_ALERT_2_G | Unusual sp?                                      | Angle Range in Main Residue for | C10   | Check  |
| PLAT343_ALERT_2_G | Unusual sp?                                      | Angle Range in Main Residue for | C11   | Check  |
| PLAT343_ALERT_2_G | Unusual sp?                                      | Angle Range in Main Residue for | C35   | Check  |
| PLAT343_ALERT_2_G | Unusual sp?                                      | Angle Range in Main Residue for | C36   | Check  |
| PLAT343_ALERT_2_G | Unusual sp?                                      | Angle Range in Main Residue for | C44   | Check  |
| PLAT343_ALERT_2_G | Unusual sp?                                      | Angle Range in Main Residue for | C45   | Check  |
| PLAT367_ALERT_2_G | Long?                                            | C(sp?)-C(sp?) Bond C1 - C2 ..   | 1.66  | Ang.   |
| PLAT367_ALERT_2_G | Long?                                            | C(sp?)-C(sp?) Bond C1 - C3 ..   | 1.51  | Ang.   |
| PLAT367_ALERT_2_G | Long?                                            | C(sp?)-C(sp?) Bond C10 - C11 .. | 1.65  | Ang.   |
| PLAT367_ALERT_2_G | Long?                                            | C(sp?)-C(sp?) Bond C10 - C12 .. | 1.50  | Ang.   |
| PLAT367_ALERT_2_G | Long?                                            | C(sp?)-C(sp?) Bond C35 - C36 .. | 1.65  | Ang.   |
| PLAT367_ALERT_2_G | Long?                                            | C(sp?)-C(sp?) Bond C35 - C37 .. | 1.52  | Ang.   |
| PLAT367_ALERT_2_G | Long?                                            | C(sp?)-C(sp?) Bond C44 - C45 .. | 1.66  | Ang.   |
| PLAT432_ALERT_2_G | Short Inter X...Y Contact                        | Cl1 .. C69 ..                   | 1.95  | Ang.   |
| PLAT432_ALERT_2_G | Short Inter X...Y Contact                        | Cl2 .. C69 ..                   | 1.41  | Ang.   |
| PLAT432_ALERT_2_G | Short Inter X...Y Contact                        | Cl3 .. C69 ..                   | 2.58  | Ang.   |
| PLAT432_ALERT_2_G | Short Inter X...Y Contact                        | C69 .. C69 ..                   | 1.70  | Ang.   |
| PLAT779_ALERT_4_G | Suspect or Irrelevant (Bond) Angle in CIF .... # |                                 | 963   | Check  |
|                   | CL2 -C69 -CL1                                    | 3.565 1.555 1.555               | 36.10 | Deg.   |
| PLAT779_ALERT_4_G | Suspect or Irrelevant (Bond) Angle in CIF .... # |                                 | 968   | Check  |
|                   | CL2 -C69 -CL1                                    | 1.555 1.555 3.565               | 32.20 | Deg.   |
| PLAT860_ALERT_3_G | Number of Least-Squares Restraints .....         |                                 | 35    | Note   |
| PLAT910_ALERT_3_G | Missing # of FCF Reflection(s) Below Theta(Min)  |                                 | 2     | Note   |
| PLAT912_ALERT_4_G | Missing # of FCF Reflections Above STh/L= 0.600  |                                 | 89    | Note   |
| PLAT913_ALERT_3_G | Missing # of Very Strong Reflections in FCF .... |                                 | 1     | Note   |
| PLAT933_ALERT_2_G | Number of OMIT Records in Embedded .res File ... |                                 | 3     | Note   |
| PLAT978_ALERT_2_G | Number C-C Bonds with Positive Residual Density. |                                 | 2     | Note   |

---

0 **ALERT level A** = Most likely a serious problem - resolve or explain  
 2 **ALERT level B** = A potentially serious problem, consider carefully  
 21 **ALERT level C** = Check. Ensure it is not caused by an omission or oversight  
 42 **ALERT level G** = General information/check it is not something unexpected

5 ALERT type 1 CIF construction/syntax error, inconsistent or missing data  
 36 ALERT type 2 Indicator that the structure model may be wrong or deficient  
 10 ALERT type 3 Indicator that the structure quality may be low  
 14 ALERT type 4 Improvement, methodology, query or suggestion  
 0 ALERT type 5 Informative message, check

---

It is advisable to attempt to resolve as many as possible of the alerts in all categories. Often the minor alerts point to easily fixed oversights, errors and omissions in your CIF or refinement strategy, so attention to these fine details can be worthwhile. In order to resolve some of the more serious problems it may be necessary to carry out additional measurements or structure refinements. However, the purpose of your study may justify the reported deviations and the more serious of these should normally be commented upon in the discussion or experimental section of a paper or in the "special\_details" fields of the CIF. checkCIF was carefully designed to identify outliers and unusual parameters, but every test has its limitations and alerts that are not important in a particular case may appear. Conversely, the absence of alerts does not guarantee there are no aspects of the results needing attention. It is up to the individual to critically assess their own results and, if necessary, seek expert advice.

### **Publication of your CIF in IUCr journals**

A basic structural check has been run on your CIF. These basic checks will be run on all CIFs submitted for publication in IUCr journals (*Acta Crystallographica*, *Journal of Applied Crystallography*, *Journal of Synchrotron Radiation*); however, if you intend to submit to *Acta Crystallographica Section C* or *E* or *IUCrData*, you should make sure that full publication checks are run on the final version of your CIF prior to submission.

### **Publication of your CIF in other journals**

Please refer to the *Notes for Authors* of the relevant journal for any special instructions relating to CIF submission.

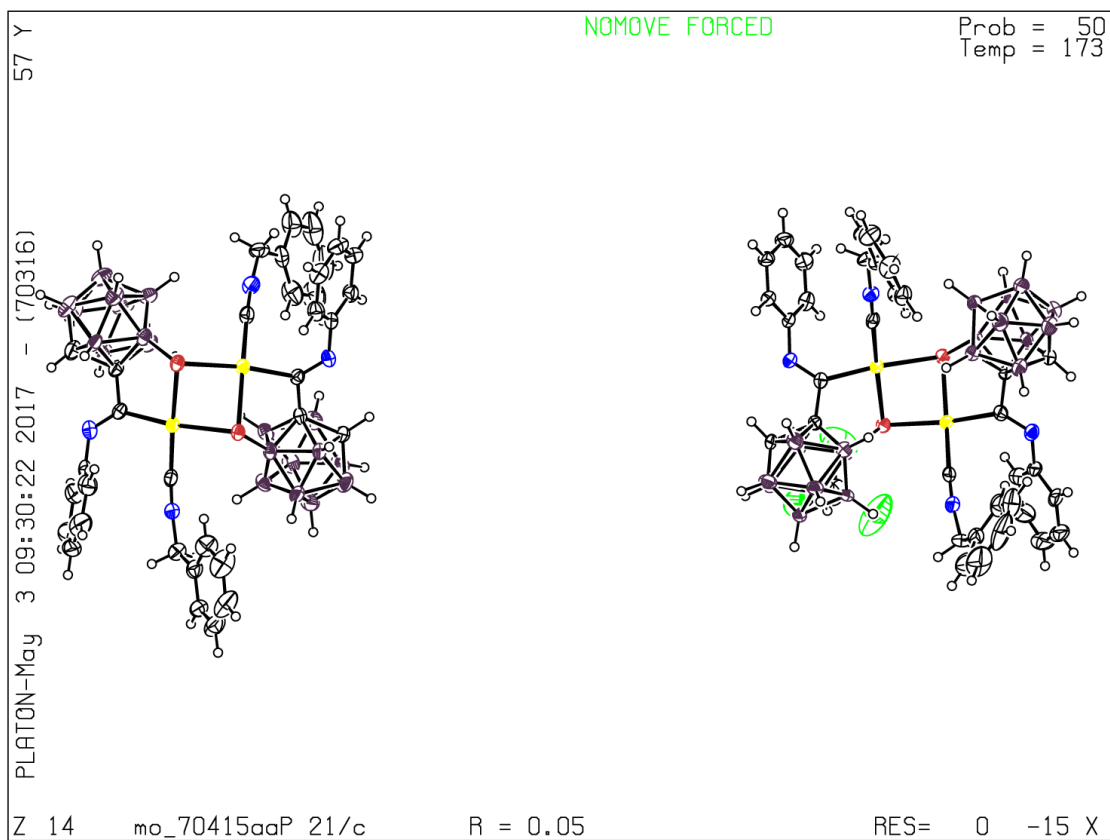

Supplement: Supplementary file 3 [file Complex_4-checkcif.pdf › Complex_4-checkcif.pdf]
